# Supplementary material
Source: publisher figshare collection journal article supplement (https://karger.figshare.com/ndownloader/files/13628642)
Supplement: Supplementary file 1 [file 13628642]

**I) Preoperative questionnaire (all questionnaires translated from german)**

1) General contentment and quality of life

- *I describe my health condition as*
  - Perfect - A little less than good
- Very good - Bad
- Good
- *General satisfaction with life*
- Absolutely - Usually not
- Most of the time - Not at all
- Sometimes

2) Feelings Never Sometimes Usually Always

- *I am feeling anxious and unsecure - - - -*
- *I am feeling down and depressed - - - -*
- *I do have pain and physically problems - - - -*

3) Everyday Life

- *Are you able to care for yourself?*
- I don´t have any problems to care for myself
- I have small problems in my everyday life and sometimes need assistance
- I often have problems in my everyday life and usually need assistance
- I have severe problems in my everyday life and always need assistance
- *Work, household and activity (e.g. going for a walk, ride bike, carrying things at home)*
- I do not have any problems
- Sometimes I am disabled in my everyday life
- I am often disabled in my everyday life
- I am not able to do anything on my ow

4) Physical health

- *I am contemplating about voiding urine permanently*
- Yes, and I do not feel save outside my house/my toilet
- Yes, and I sometime avoid situations, that were normal before I turned ill
- Yes, but I do not feel disabled
- No, I am not contemplating about voiding urine/ not more than healthy people
- *I do feel physically fit*
- Absolutely - Usually I do not feel physically fit
- Usually I feel fit - I do not feel physically fit at all
- *I have to rest during everyday life*
- I never have to rest - Sometimes I have to rest, after physical exercise
- I do rest most of the time - I rest all day long (e.g. sitting or lying in bed)
- *Sleep*
- I sleep well through the night without nocturnal voiding
- I usually sleep well and sometimes have to void at night
- I usually sleep lightly (e.g. fear to wet the bed)
- I do not sleep well (e.g. wet the bed, have to change clothes, bedclothes, pantyliner)
- *Digestion problems (e.g. diarrhea, obstipation, nausea, vomiting)*
- I do not have digestion problems
- I do have digestion problems rarely
- I often have digestion problems and help myself with domestic remedy
- I do have sever digestion problems and I am on medication for this
- *My sexual life is*
- Very good - Bad (e.g. potency problems, need for medical assistance)
- Good - I am not having a sexual life at all

5) Continence

- *Do you have problems with your continence?*
- No, I am continent (no loss of urine during night, at work, exercise or sports)
- I sometimes lose urine (during night, hard exercise)
- I lose urine when I laugh, cough or sneeze (light exercise / 1-2 pantyliner)
- I have severe continence problems (without exercise / more than 3 pantyliner)
- *Do you fear to not reach the toilet in time? (urge incontinence)*
- Never - sometimes
- Rarely - always
- *Did your continence situation change during the last months?*
- It became continuously better
- It became lightly better
- No change at all
- It became continuously worse

**II) Postoperative questionnaire – ileal conduit**

1) General contentment and quality of life

- *I describe my health condition as*
  - Perfect - A little less than good
- Very good - Bad
- Good
- *Am I satisfied with my life?*
- Absolutely - Usually not
- Most of the time - Not at all
- Sometimes

2) Surgery

- *Since I underwent surgery, I feel*
- A lot better, than before - No difference before and after surgery
- A little better, than before - Worse, than before surgery
- *If I could turn back time, I would decide for this surgery again*
- Absolutely yes - No, I don´t think so
- Yes, I think so - Absolutely not
- *I do talk about my illness and the operation openly*
- Yes, that is right
- I avoid talking about it
- I feel awful about it
- *I am contemplating about my urine bag permanently*
- Yes, and I do not feel save outside my house/my toilet
- Yes, and I sometime avoid situations, that were normal for me before I underwent surgery
- Yes, but I do not feel disabled
- No, I do not contemplate more than healthy people

3) Feelings

Never Sometimes Usually Always

- *I am feeling anxious and unsecure - - - -*
- *I am feeling down and depressed - - - -*
- *I do have pain and physically problems - - - -*

4) Everyday Life

- *Are you able to care for yourself?*
- I don´t have any problems to care for myself
- I have small problems in my everyday life and sometimes need outside assistance
- I often have problems in my everyday life and usually need outside assistance
- I have severe problems in my everyday life and always need outside assistance
- *Work, household and activity (e.g. going for a walk, ride bike, carrying things at home)*
- I do not have any problems
- Sometimes I am disabled in my everyday life
- Often I am disabled in my everyday life
- I am not able to do anything on my own

5) Physical health

- *I do feel physically fit*
- Absolutely - Usually I do not feel physically fit
- Usually I feel fit - I do not feel physically fit at all
- *I have to rest during everyday life*
- I never have to rest - Sometimes I have to rest, after physical exercise
- I do rest most of the time - I rest all day long (e.g. sitting or lying in bed)
- *Sleep*
- I sleep better, than before surgery
- The surgery did not change my sleeping habits
- I usually sleep lightly (e.g. fear to wet the bed/ leaking urine bag)
- I do not sleep well (e.g. leaking urine bag, wet the bed, have to change clothes, bedclothes, urine bag)
- *Digestion problems (e.g. diarrhea, obstipation, nausea, vomiting)*
- I do not have digestion problems
- I do have digestion problems rarely
- I often have digestion problems and help myself with domestic remedy
- I do have sever digestion problems and I am on medication for this
- *My sexual life is*
- Better, than before surgery - Bad (e.g. potency problems, need for medical assistance)
- The surgery did not change my sexual life - I am not having a sexual life at all

6) Continence/ Stoma handling

- *Do you have problems with stoma handling since you underwent surgery? (e.g. skin care, changing bags)*
- No, I do not have any problems and I care for myself
- I rarely need outside assistance
- I sometimes need outside assistance
- I have severe problems and always need outside assistance
- *I am content with my urinary bag?*
- Yes, and the bag is leak-proof - Yes, but I sometimes lose urine beside the bag
- Yes, although I rarely lose urine beside the bag - No, because I often lose urine beside the bag
- *Did stoma handling change since you underwent surgery?*
- It became continuously better - No change at all
- It became lightly better - It became continuously worse

**III) Postoperative questionnaire – neobladder**

1) General contentment and quality of life

- *I describe my health condition as*
  - Perfect - A little less than good
- Very good - Bad
- Good
- *I am satisfied with my life*
- Absolutely - Usually not
- Most of the time - Not at all
- Sometimes

2) Operation

- *Since I underwent surgery, I feel*
- A lot better, than before - No difference before and after surgery
- A little better, than before - Worse, than before surgery
- *If I could turn back time, I would decide for this surgery again*
- Absolutely yes - No, I don´t think so
- Yes, I think so - Absolutely not
- *I do talk about my illness and the operation openly*
- Yes, that is right
- I avoid talking about it
- I feel awful about it
- *I am contemplating about voiding urine permanently*
- Yes, and I do not feel save outside my house/my toilet
- Yes, and I sometime avoid situations, that were normal before I underwent surgery
- Yes, but I do not feel disabled
- No, I am not contemplating more than healthy people

3) Feelings

Never Sometimes Usually Always

- *I am feeling anxious and unsecure - - - -*
- *I am feeling down and depressed - - - -*
- *I do have pain and physically problems - - - -*

4) Everyday Life

- *Are you able to care for yourself?*
- I don´t have any problems to care for myself
- I have small problems in my everyday life and sometimes need outside assistance
- I often have problems in my everyday life and usually need outside assistance
- I have severe problems in my everyday life and always need outside assistance
- *Work, household and activity (e.g. going for a walk, ride bike, carrying things at home)*
- I do not have any problems
- Sometimes I am disabled in my everyday life
- Often I am disabled in my everyday life
- I am not able to do anything on my own

5) Physical health

- *I do feel physically fit*
- Absolutely - Usually I do not feel physically fit
- Usually I feel fit - I do not feel physically fit at all
- *I have to rest during everyday life*
- I never have to rest - Sometimes I have to rest, after physical exercise
- I do rest most of the time - I rest all day long (e.g. sitting or lying in bed)
- *Sleep*
- I sleep better than before surgery
- The surgery did not change my sleeping habits
- I usually sleep lightly (e.g. fear to wet the bed)
- I do not sleep well (e.g. wet the bed, have to change clothes, bedclothes, pantyliner)
- *Digestion problems (e.g. diarrhea, obstipation, nausea, vomiting)*
- I do not have digestion problems
- I do have digestion problems rarely
- I often have digestion problems and help myself with domestic remedy
- I do have sever digestion problems and I am on medication for this
- *My sexual life is*
- Better, than before surgery - Bad (e.g. potency problems, need for medical assistance)
- The surgery did not change my sexual life - I am not having a sexual life at all

6) Continence

- *Do you have problems with your continence since you underwent surgery?*
- No, I am continent (no loss of urine during night, at work, exercise or sports)
- I sometimes lose urine (during night, hard exercise)
- I lose urine when I laugh, cough or sneeze (light exercise / 1-2 pantyliner)
- I have severe continence problems (without exercise / more than 3 pantyliner)
- *Do you fear to not reach the toilet in time? (urge incontinence)*
- Never - Sometimes
- Rarely - Always
- *Did your continence situation change since you underwent surgery?*
- It became continuously better - No change at all
- It became lightly better - It became continuously worse

**IV) Postoperative questionnaire – ileocoecal pouch**

1) General contentment and quality of life

- *I describe my health condition as*
  - Perfect - A little less than good
- Very good - Bad
- Good
- *Am I satisfied with my life?*
- Absolutely - Usually not
- Most of the time - Not at all
- Sometimes

2) Operation

- *Since I underwent surgery, I feel*
- A lot better, than before - No difference before and after surgery
- A little better, than before - Worse, than before surgery
- *If I could turn back time, I would decide for this surgery again*
- Absolutely yes - No, I don´t think so
- Yes, I think so - Absolutely not
- *I do talk about my illness and the operation openly*
- Yes, that is right
- I avoid talking about it
- I feel awful about it
- *I am contemplating about about self-catheterism permanently*
- Yes, and I do not feel save outside my house/my toilet
- Yes, and I sometime avoid situations, that were normal before I underwent surgery
- Yes, but I do not feel disabled
- No, I am not contemplating more than healthy people

3) Feelings

Never Sometimes Usually Always

- *I am feeling anxious and unsecure - - - -*
- *I am feeling down and depressed - - - -*
- *I do have pain and physically problems - - - -*

4) Everyday Life

- *Are you able to care for yourself?*
- I don´t have any problems to care for myself
- I have small problems in my everyday life and sometimes need outside assistance
- I often have problems in my everyday life and usually need outside assistance
- I have severe problems in my everyday life and always need outside assistance
- *Work, household and activity (e.g. going for a walk, ride bike, carrying things at home)*
- I do not have any problems
- Sometimes I am disabled in my everyday life
- Often I am disabled in my everyday life
- I am not able to do anything on my own

5) Physical health

- *I do feel physically fit*
- Absolutely - Usually I do not feel physically fit
- Usually I feel fit - I do not feel physically fit at all
- *I have to rest during everyday life*
- I never have to rest - Sometimes I have to rest, after physical exercise
- I do rest most of the time - I rest all day long (e.g. sitting or lying in bed)
- *Sleep*
- I sleep better, than before surgery
- The surgery did not change my sleeping habits
- I usually sleep lightly (e.g. fear to wet the bed/ leaking stoma)
- I do not sleep well (e.g. leaking stoma, wet the bed, have to change clothes, bedclothes)
- *Digestion problems (e.g. diarrhea, obstipation, nausea, vomiting)*
- I do not have digestion problems
- I do have digestion problems rarely
- I often have digestion problems and help myself with domestic remedy
- I do have sever digestion problems and I am on medication for this
- *My sexual life is*
- Better, than before surgery - Bad (e.g. impotence, need for medical assistance)
- The surgery did not change my sexual life - I am not having sex at all

6) Continence

- *Do you have problems with your self-catheterism (CIC= clean intermittent catheterization)?*
- It works unproblematically. I care for myself (5/5 successful CIC)
- I sometimes have light problems with CIC. It does not always work at first try (4/5)
- I usually have problems with CIC and need outside assistance or a mirror (2-3/5)
- I have severe problems with CIC and often need outside assistance or have to try often (1/5)
- *The umbilical/cutaneous stoma is leak-proof*
- Yes, I never lose urine - Yes, but I lose urine at light exercise
- Yes, but I lose urine at hard exercise - No, I usually lose urine
- *Did the self-catheterism change since you underwent surgery?*
- It became continuously better - No change at all
- It became lightly better - It became continuously worse
